# Supplementary material for: Simulating the formation of carbonaceous aerosol in a European Megacity (Paris) during the MEGAPOLI summer and winter campaigns
Source: Copernicus journal article supplement (doi:10.5194/acp-16-3727-2016), 2016-03-21
Supplement: Supplementary file 1 [file acp-16-3727-2016-supplement.pdf]

Supplement of Atmos. Chem. Phys., 16, 3727–3741, 2016  
<http://www.atmos-chem-phys.net/16/3727/2016/>  
doi:10.5194/acp-16-3727-2016-supplement  
© Author(s) 2016. CC Attribution 3.0 License.

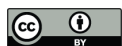

Atmospheric  
Chemistry  
and Physics  
Open Access  
EGU

*Supplement of*

## **Simulating the formation of carbonaceous aerosol in a European Megacity (Paris) during the MEGAPOLI summer and winter campaigns**

**Christos Fountoukis et al.**

*Correspondence to:* Spyros N. Pandis ([spyros@chemeng.upatras.gr](mailto:spyros@chemeng.upatras.gr))

The copyright of individual parts of the supplement might differ from the CC-BY 3.0 licence.

**Table S1.** Contribution (%) of major sources to primary OA and BC emissions in Paris during the MEGAPOLI summer and winter campaigns.

| Source sector          | Summer |    | Winter |    |
|------------------------|--------|----|--------|----|
|                        | POA    | BC | POA    | BC |
| Traffic                | 33     | 72 | 8      | 41 |
| Residential combustion | 20     | 7  | 81     | 45 |

**Table S2.** Prediction skill metrics of PMCAMx against factor-analysis AMS data for vehicular POA during the MEGAPOLI summer and winter campaigns.

| vehicular POA                           | Summer |       |      |         | Winter |       |      |         |
|-----------------------------------------|--------|-------|------|---------|--------|-------|------|---------|
|                                         | LHVP   | SIRTA | GOLF | Average | LHVP   | SIRTA | GOLF | Average |
| Mean predicted ( $\mu\text{g m}^{-3}$ ) | 0.3    | 0.15  | 0.2  | 0.25    | 0.35   | 0.2   | 0.25 | 0.3     |
| Mean observed ( $\mu\text{g m}^{-3}$ )  | 0.2    | 0.2   | -    | 0.2     | 0.7    | 0.8   | 0.65 | 0.7     |
| FERROR                                  | 0.6    | 0.5   | -    | 0.6     | 0.8    | 1.2   | 0.9  | 1       |
| FBIAS                                   | 0.3    | -0.4  | -    | 0.1     | -0.7   | -1.2  | -0.8 | -0.9    |
| MAGE ( $\mu\text{g m}^{-3}$ )           | 0.2    | 0.15  | -    | 0.2     | 0.4    | 0.6   | 0.4  | 0.5     |
| MB ( $\mu\text{g m}^{-3}$ )             | 0.15   | -0.1  | -    | 0.05    | -0.4   | -0.6  | -0.3 | -0.4    |

**Table S3.** Prediction skill metrics of PMCAMx against factor-analysis AMS data for BBOA during the MEGAPOLI winter campaign.

| BBOA                                    | Winter |       |      |         |
|-----------------------------------------|--------|-------|------|---------|
|                                         | LHVP   | SIRTA | GOLF | Average |
| Mean predicted ( $\mu\text{g m}^{-3}$ ) | 1.3    | 0.7   | 0.8  | 0.95    |
| Mean observed ( $\mu\text{g m}^{-3}$ )  | 1      | 1     | 0.65 | 0.85    |
| FERROR                                  | 0.7    | 0.8   | 0.8  | 0.7     |
| FBIAS                                   | 0.2    | -0.3  | 0.3  | 0.1     |
| MAGE ( $\mu\text{g m}^{-3}$ )           | 0.8    | 0.7   | 0.6  | 0.7     |
| MB ( $\mu\text{g m}^{-3}$ )             | 0.3    | -0.3  | 0.15 | 0.1     |

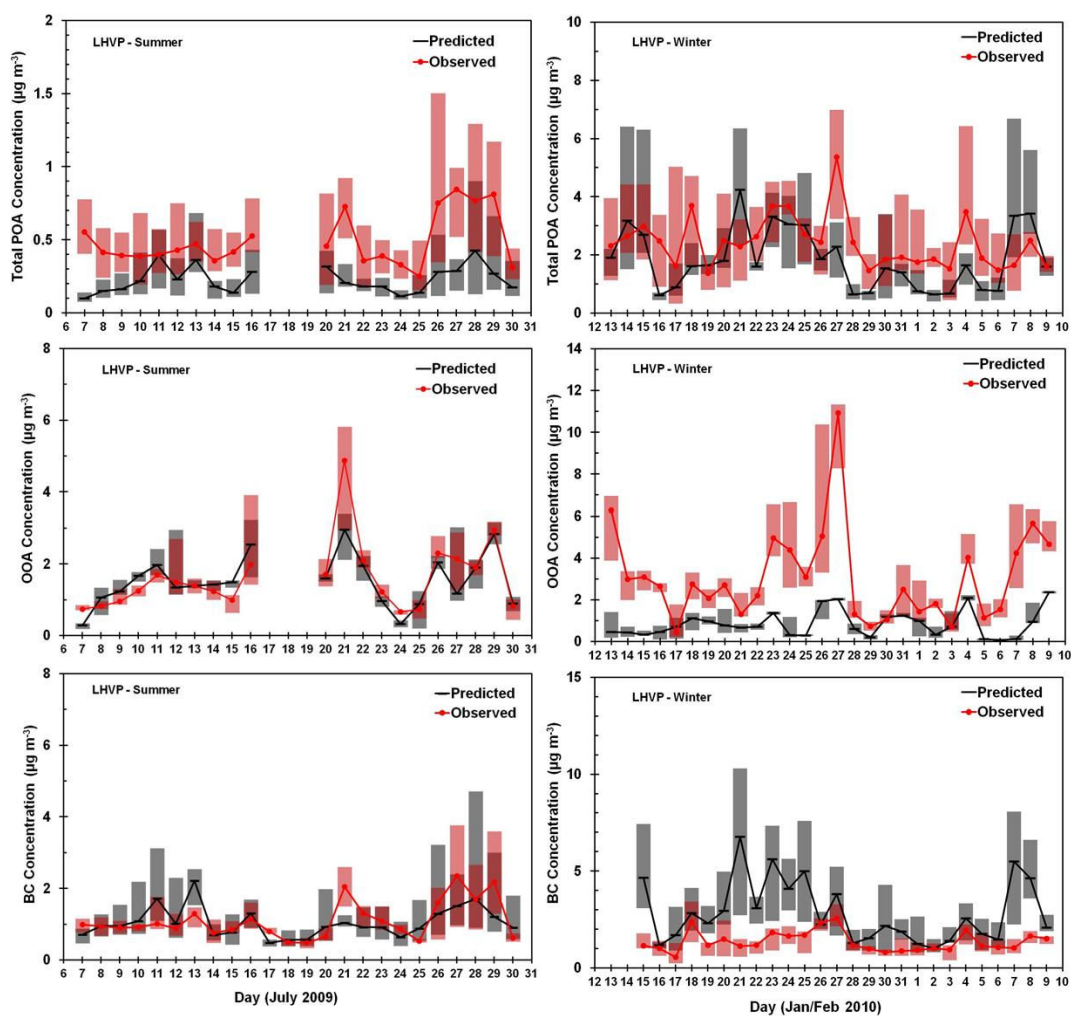

**Figure S1.** Daily-averaged concentrations of predicted and observed total POA, OOA and BC in Paris city center during the MEGAPOLI summer and winter campaigns. The shaded vertical bars indicate the 25<sup>th</sup> and 75<sup>th</sup> percentiles (gray color represents the predicted and pink the observed values).

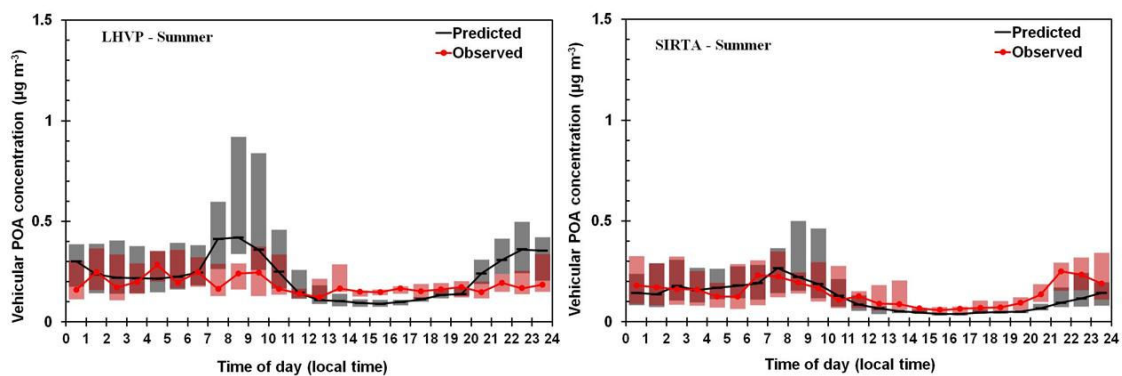

**Figure S2.** Average diurnal profiles of predicted and measured vehicular POA concentrations on LHVP and SIRTA during the MEGAPOLI summer campaign. The shaded vertical bars indicate the 25<sup>th</sup> and 75<sup>th</sup> percentiles (gray color represents the predicted and pink the observed values).

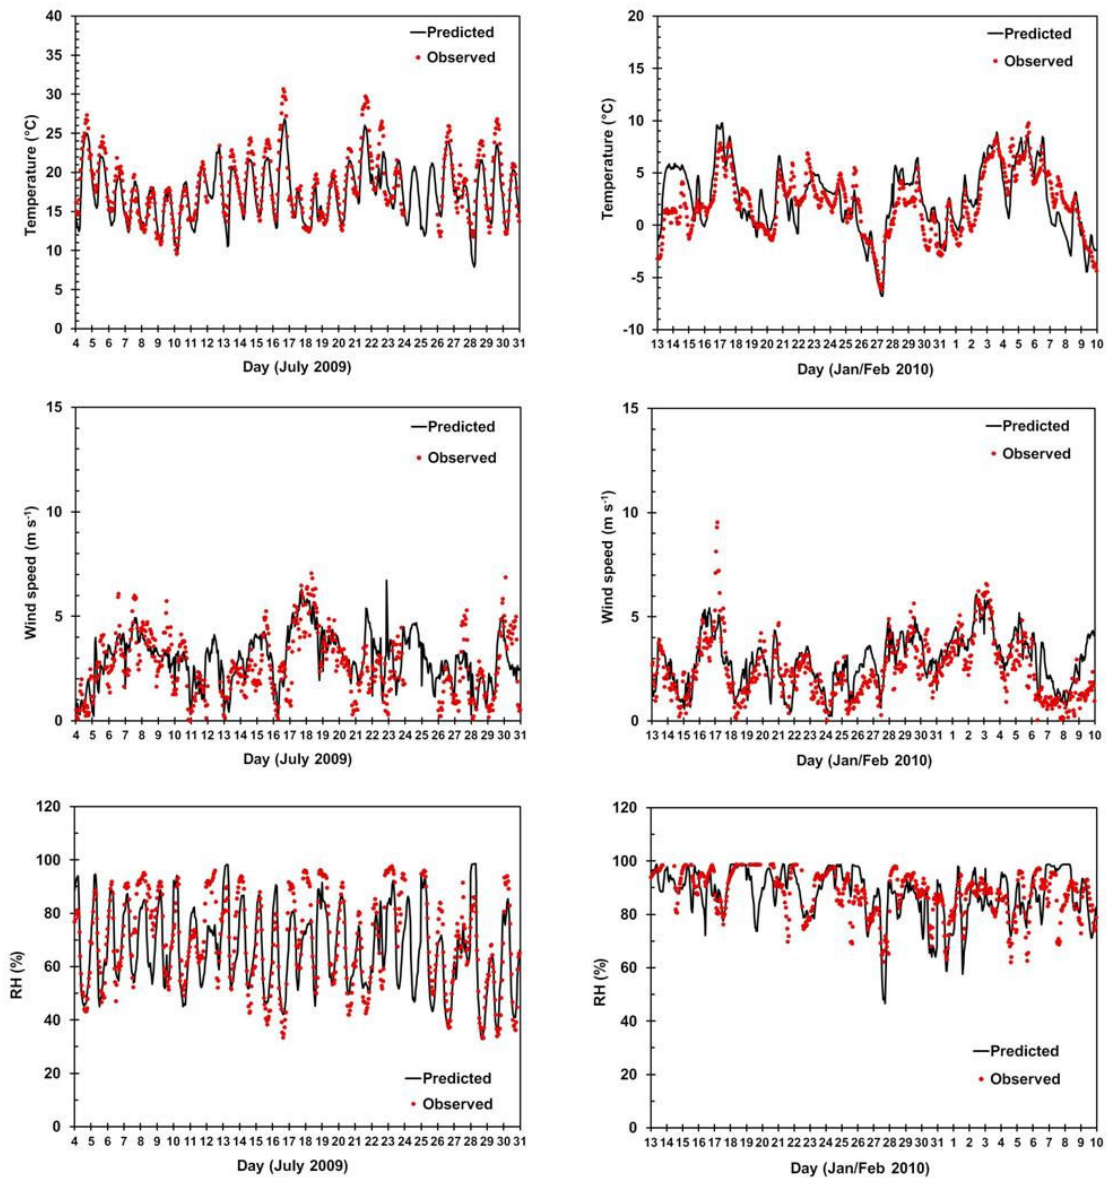

**Figure S3:** Comparison of simulated (black lines) and observed (red dots) temperature, wind velocity, and relative humidity at SIRTA during the MEGAPOLI summer and winter campaigns.

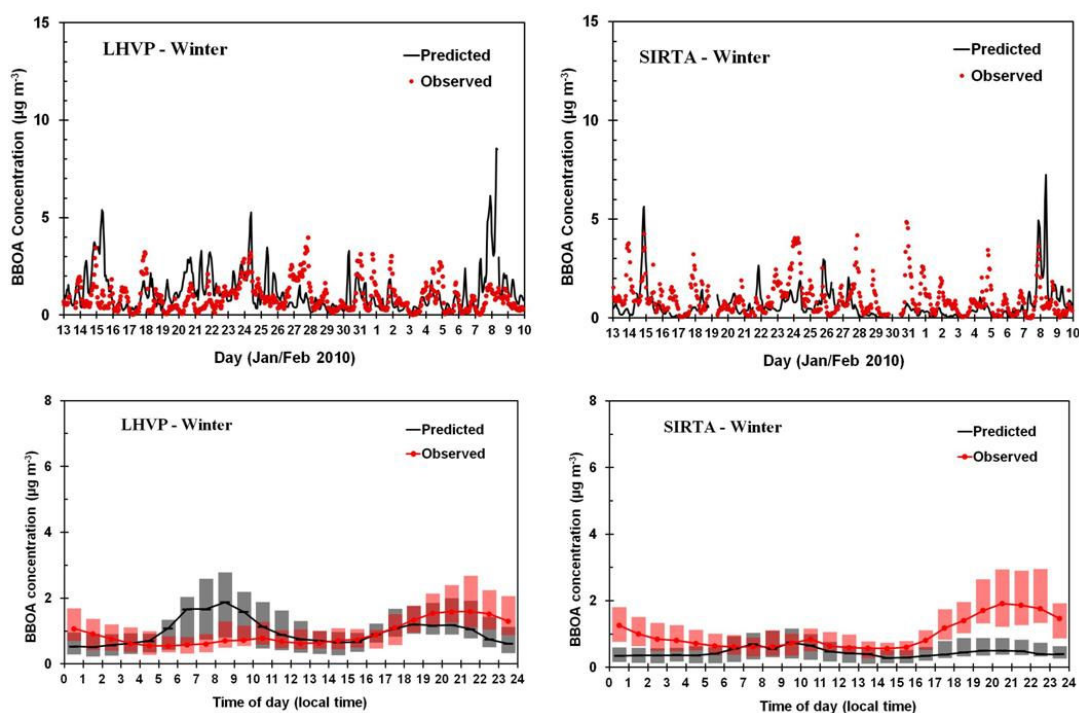

**Figure S4:** Comparison of simulated (black lines) and observed (red dots) BBOA concentrations at LHVP and SIRTA during the MEGAPOLI winter campaign. The shaded vertical bars indicate the 25<sup>th</sup> and 75<sup>th</sup> percentiles (gray color represents the predicted and pink the observed values).

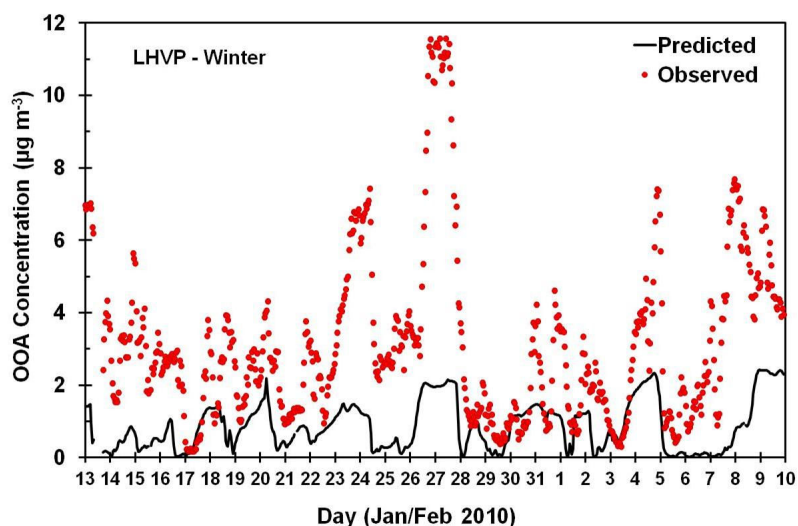

**Figure S5:** Comparison of simulated (black lines) and observed (red dots) OOA concentrations at LHVP during the MEGAPOLI winter campaign.

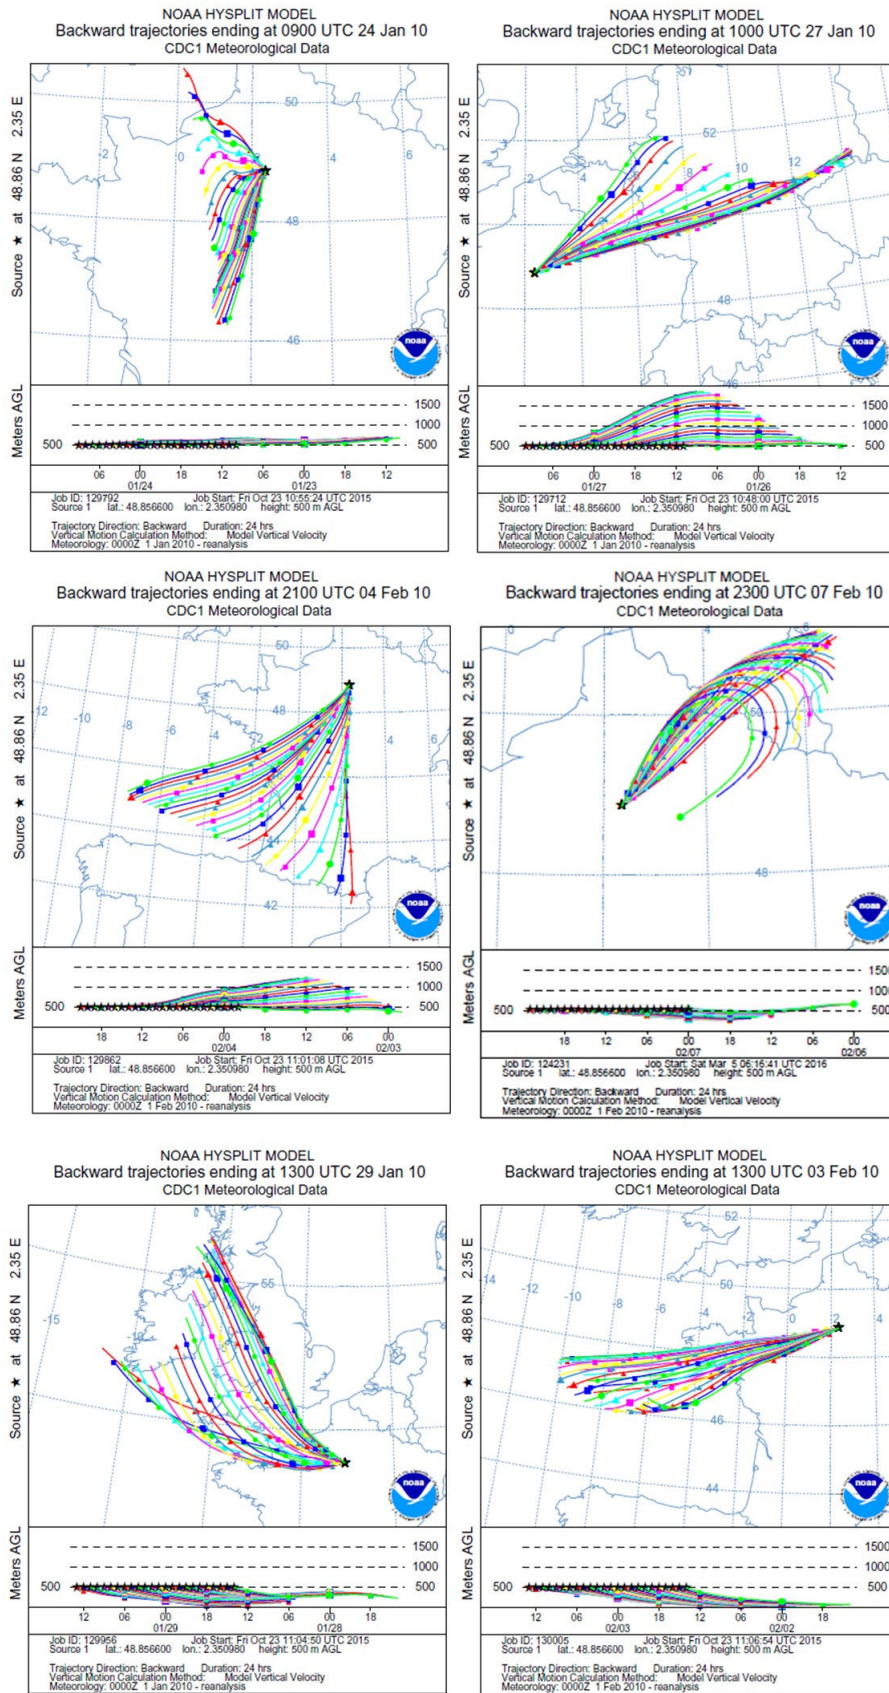

**Figure S6:** HYSPLIT backward trajectory analysis for 6 days during the MEGAPOLI winter campaign.

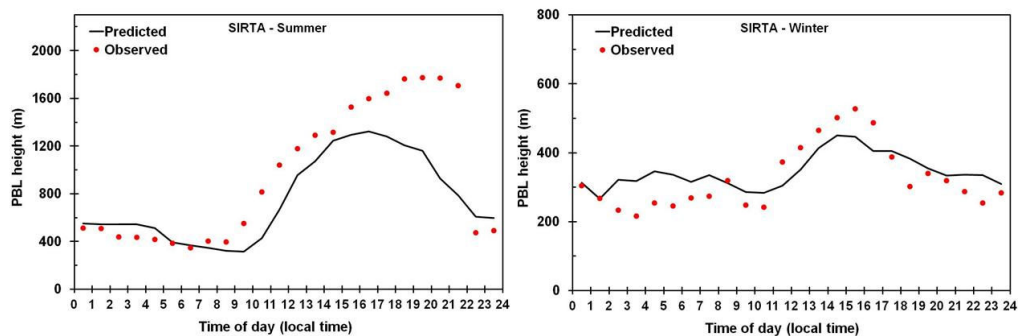

**Figure S7.** Average diurnal profiles of predicted and observed mixing height in SIRTAs during the MEGAPOLI summer and winter campaigns.

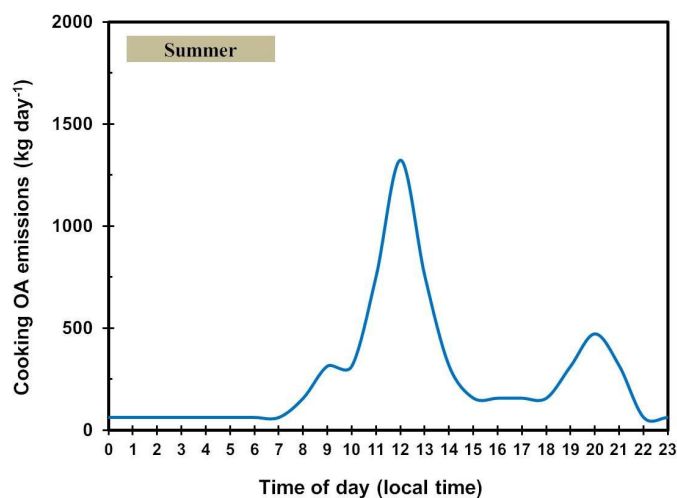

**Figure S8.** Temporal profile of cooking OA emissions added in the Paris inventory during the MEGAPOLI summer campaign.

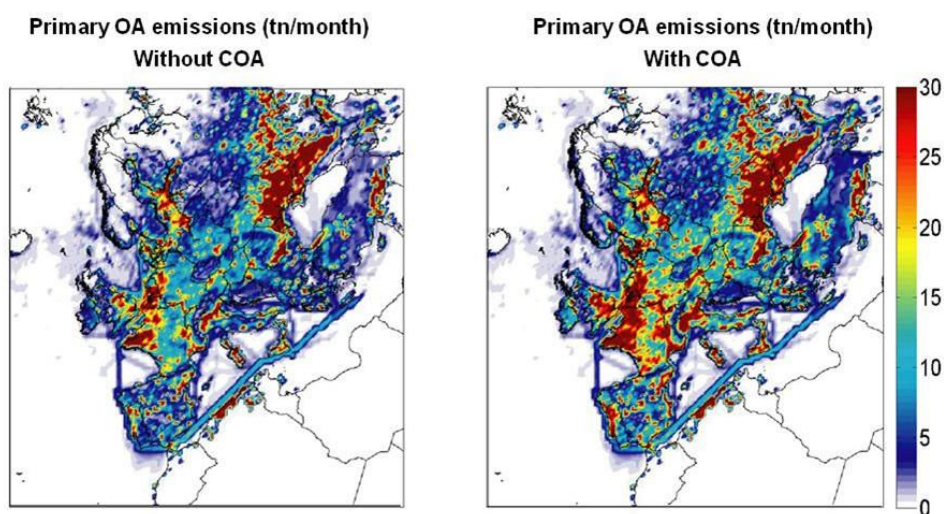

**Figure S9.** Total primary OA emissions during the July 2009 period in Europe.
